# Supplementary material for: Detailed-balance analysis of Yb3+:CsPb(Cl1−xBrx)3 quantum-cutting layers for high-efficiency photovoltaics under real-world conditions
Source: Royal Society of Chemistry journal article supplement (doi:10.1039/c9ee01493d), 2019-01-01
Supplement: c9ee01493d1.pdf [file c9ee01493d1.pdf]

*Electronic Supplementary Information for:*

## Detailed-Balance Analysis of $\text{Yb}^{3+}:\text{CsPb}(\text{Cl}_{1-x}\text{Br}_x)_3$ Quantum-Cutting Layers for High-Efficiency Photovoltaics under Real-World Conditions

Matthew J. Crane, Daniel M. Kroupa, Daniel R. Gamelin \*

*Department of Chemistry, University of Washington, Seattle, WA 98195-1700*

\*Email: [gamelin@chem.washington.edu](mailto:gamelin@chem.washington.edu)

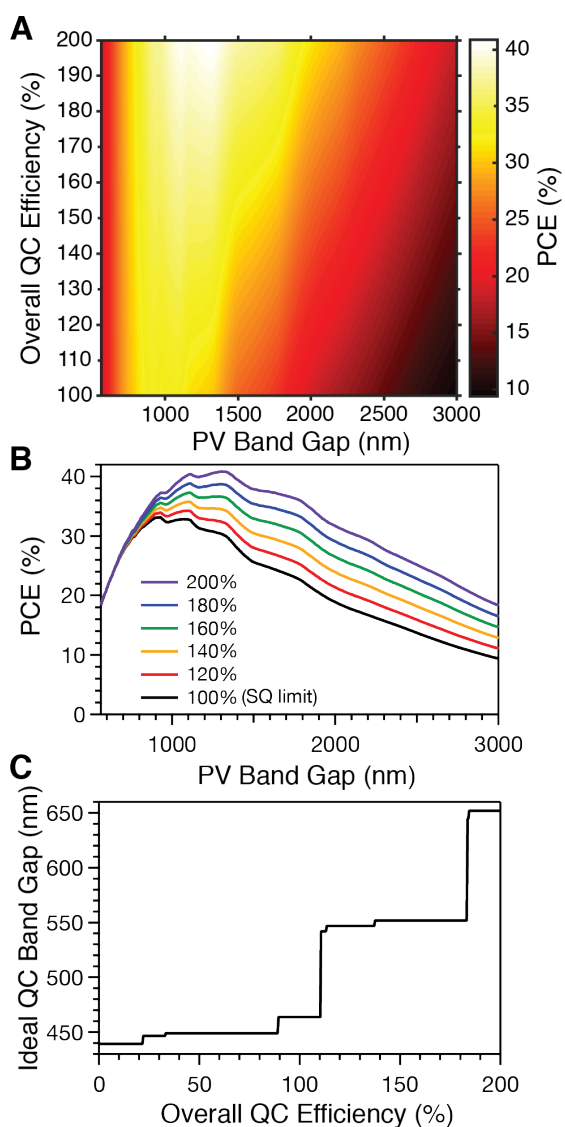

**Figure S1.** The data from Figure 2 converted to nm for convenience.

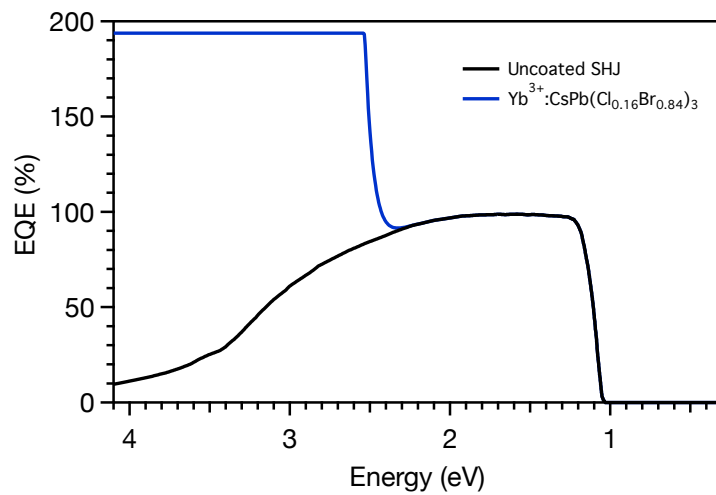

**Figure S2.** The predicted EQE of a Yb<sup>3+</sup>:CsPb(Cl<sub>0.16</sub>Br<sub>0.84</sub>)<sub>3</sub>/SHJ QC/PV device. Here,  $\eta$  is 200%. This provides a visual representation of the integrand of eq 4.

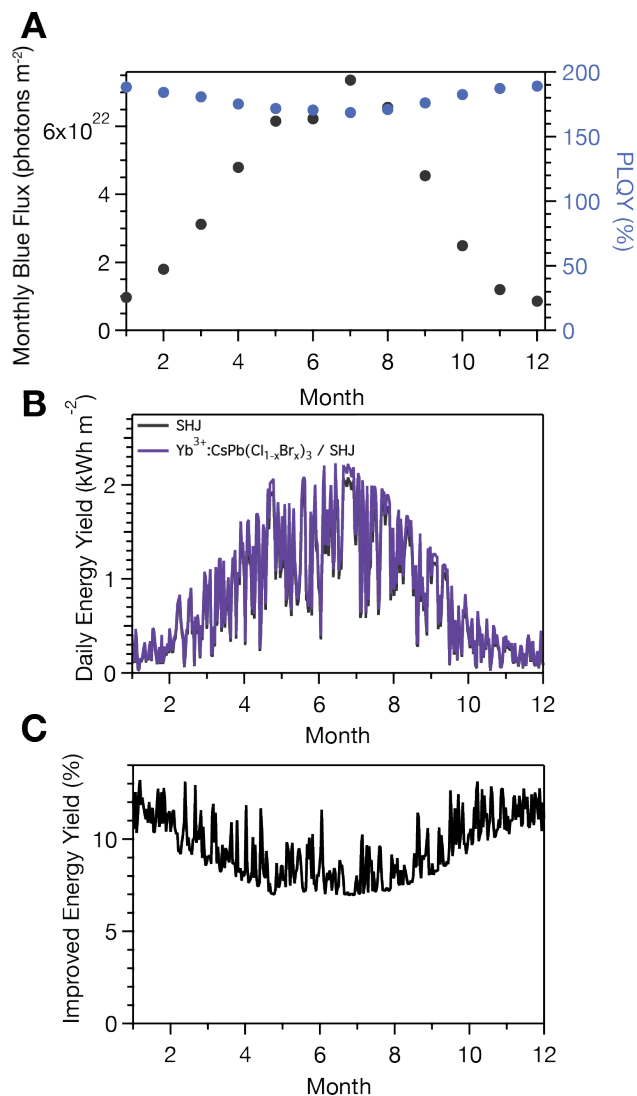

**Figure S3.** The effect of saturation on Yb<sup>3+</sup>:CsPb(Cl<sub>0.16</sub>B<sub>0.84</sub>)<sub>3</sub> PLQY and energy yield on Yb<sup>3+</sup>:CsPb(Cl<sub>0.16</sub>B<sub>0.84</sub>)<sub>3</sub>/SHJ device averaged on a day time scale for a TMD in Seattle, WA. **(A)** The total monthly flux blue flux integrated from 4.133 to 2.531 eV (300 to 490 nm), and the average monthly PLQY during hours of power generation. **(B)** A comparison of the daily energy yield produced by a SHJ device and a Yb<sup>3+</sup>:CsPb(Cl<sub>0.16</sub>B<sub>0.84</sub>)<sub>3</sub>/SHJ device and **(C)** the improved daily energy yield.

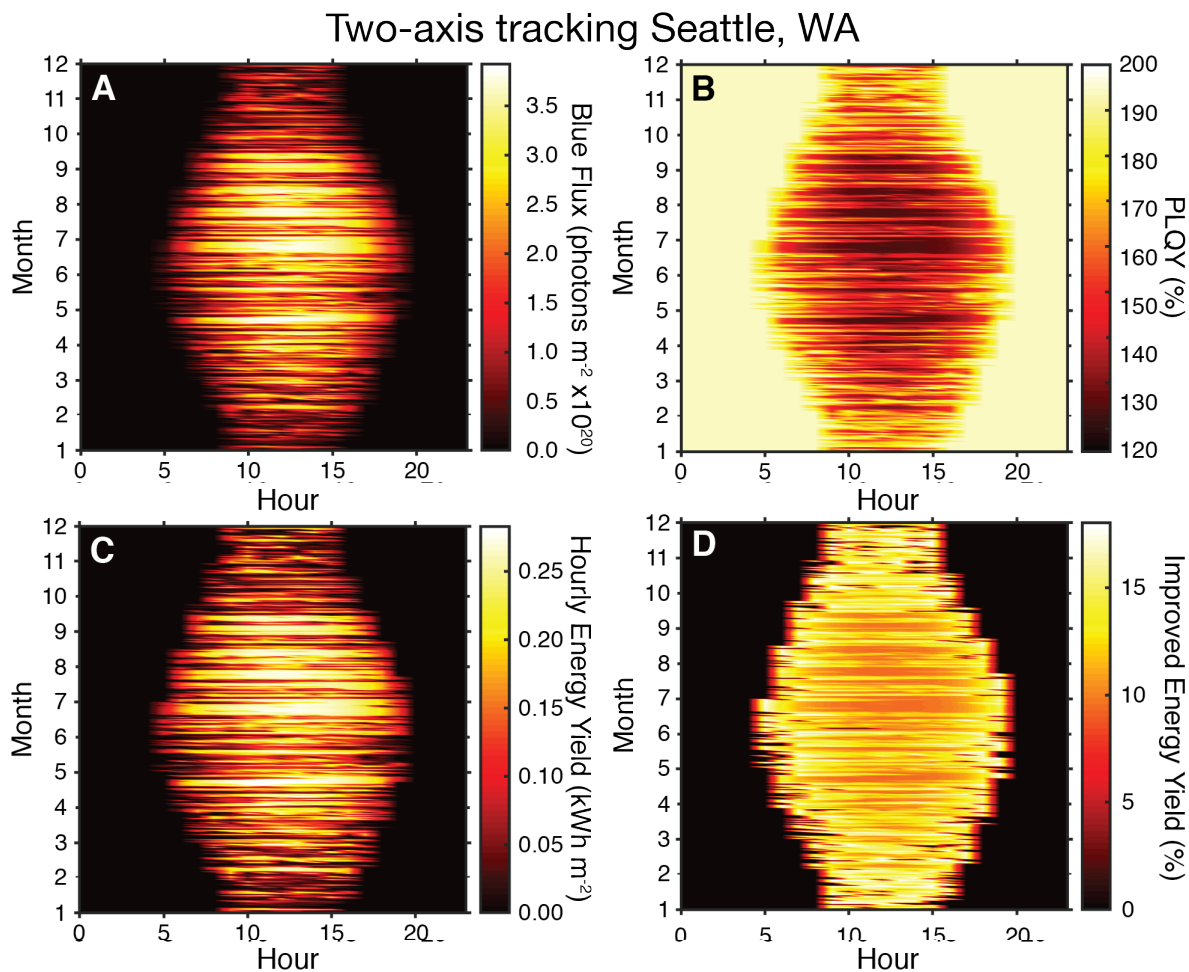

**Figure S4.** The impact of flux-dependent quantum yields for a  $\text{Yb}^{3+}:\text{CsPb}(\text{Cl}_{0.16}\text{Br}_{0.84})_3/\text{SHJ}$  QC/PV device, represented for a typical meteorological year in Seattle, WA, USA, using two-axis tracking.<sup>1</sup> **(A)** The average hourly, global horizontal irradiance (GHI) photon flux from 300 to 490 nm absorbed by an optimized  $\text{Yb}^{3+}:\text{CsPb}(\text{Cl}_{1-x}\text{Br}_x)_3$  quantum cutter. **(B)** The hourly PLQY of the QC material using the data from panel (A) and experimental PL saturation results from ref. 2. **(C)** The areal hourly energy yield of the QC/PV device, calculated using the model from Figure 4 and assuming 100% optical coupling of the QC PL. **(D)** The corresponding percent increase in areal hourly energy yield relative to a standard SHJ PV without a QC layer, in Seattle with two-axis tracking.



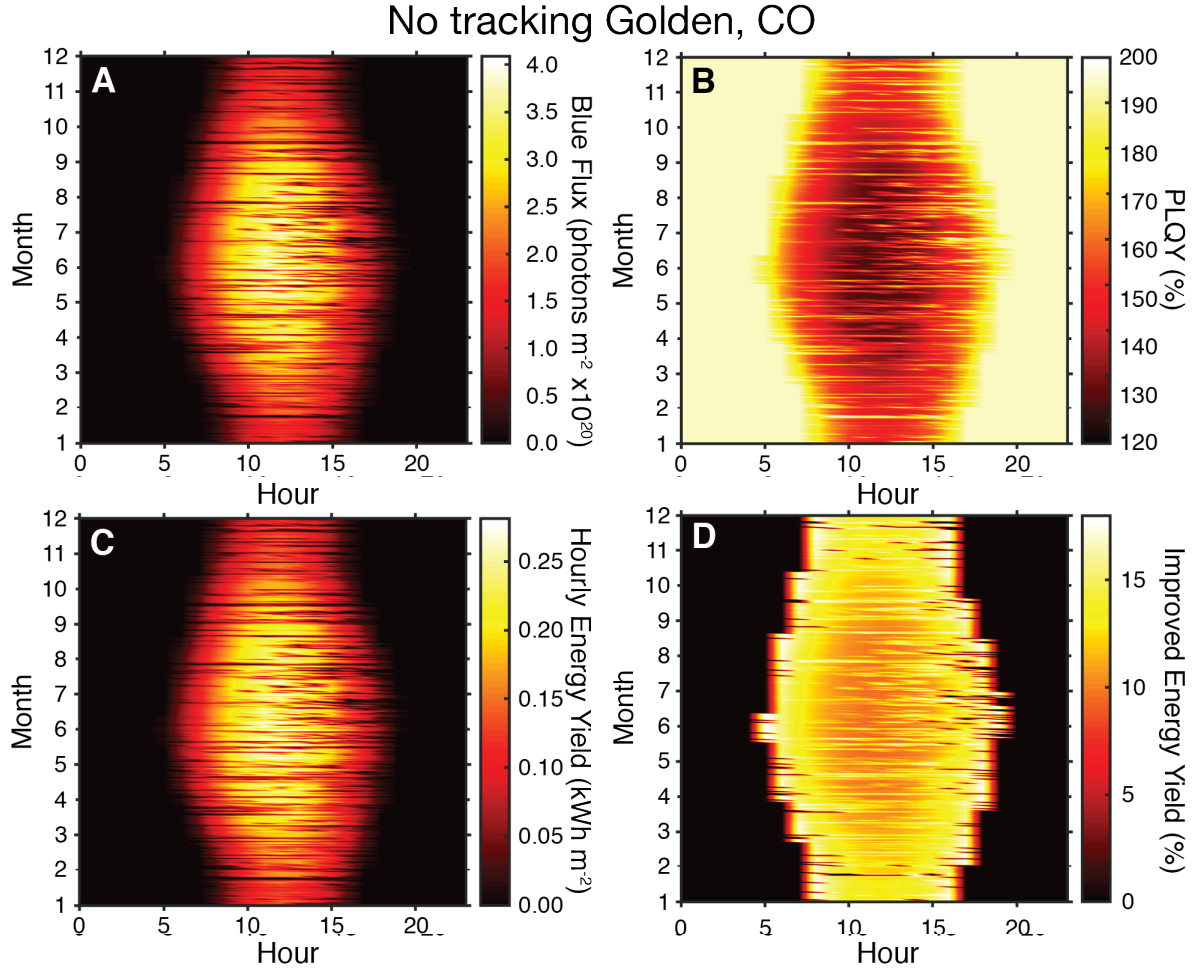

**Figure S5.** The impact of flux-dependent quantum yields for a  $\text{Yb}^{3+}:\text{CsPb}(\text{Cl}_{0.16}\text{Br}_{0.84})_3/\text{SHJ}$  QC/PV device, represented for a typical meteorological year in Golden, CO, USA, without tracking.<sup>1</sup> **(A)** The average hourly, global horizontal irradiance (GHI) photon flux from 300 to 490 nm absorbed by an optimized  $\text{Yb}^{3+}:\text{CsPb}(\text{Cl}_{1-x}\text{Br}_x)_3$  quantum cutter. **(B)** The hourly PLQY of the QC material using the data from panel (A) and experimental PL saturation results from ref. 2. **(C)** The areal hourly energy yield of the QC/PV device, calculated using the model from Figure 4 of the main text and assuming 100% optical coupling of the QC PL. **(D)** The corresponding percent increase in areal hourly energy yield relative to a standard SHJ PV without a QC layer, in Colorado.

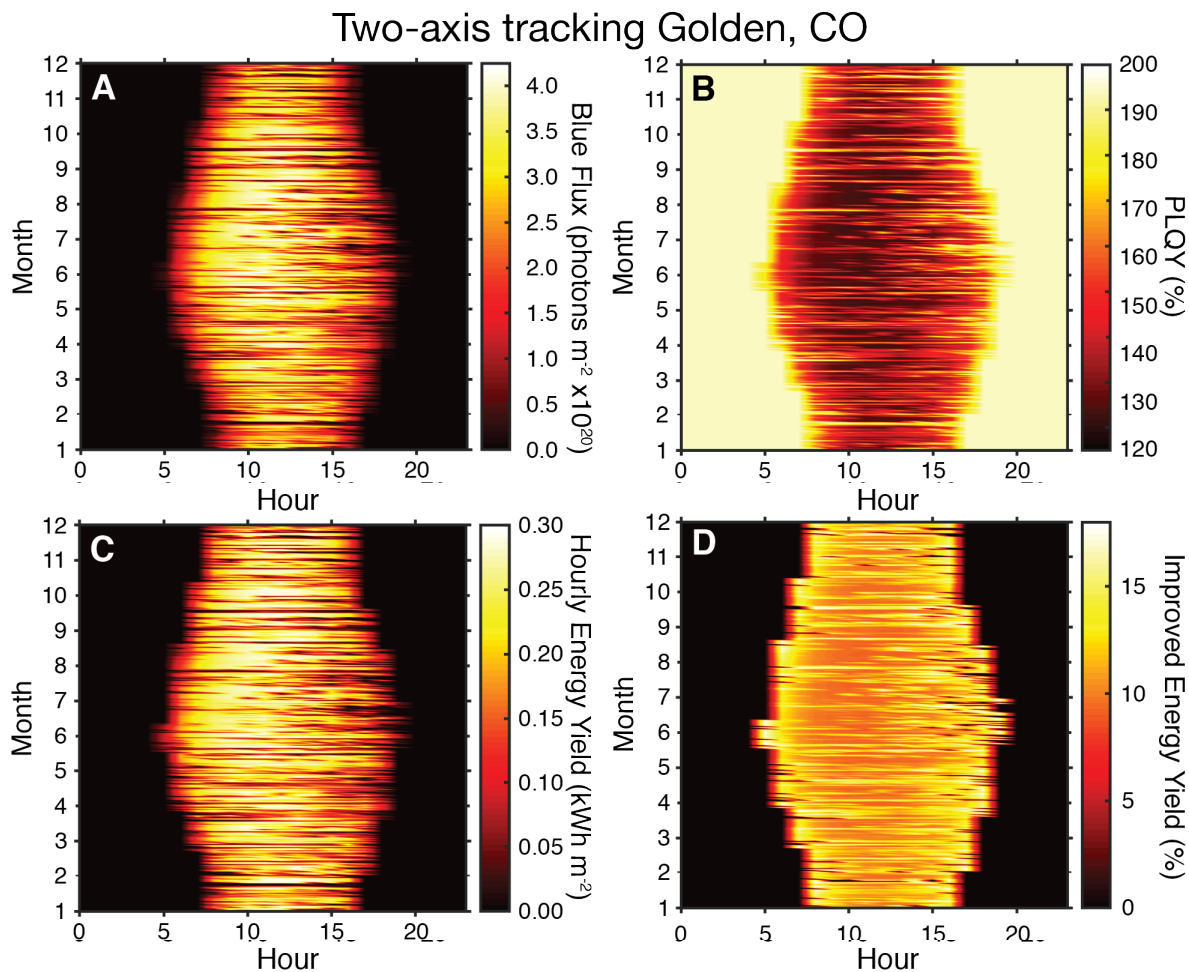

**Figure S6.** The impact of flux-dependent quantum yields for a  $\text{Yb}^{3+}:\text{CsPb}(\text{Cl}_{0.16}\text{Br}_{0.84})_3/\text{SHJ}$  QC/PV device, represented for a typical meteorological year in Golden, CO, USA, using two-axis tracking.<sup>1</sup> **(A)** The average hourly, global horizontal irradiance (GHI) photon flux from 300 to 490 nm absorbed by an optimized  $\text{Yb}^{3+}:\text{CsPb}(\text{Cl}_{1-x}\text{Br}_x)_3$  quantum cutter. **(B)** The hourly PLQY of the QC material using the data from panel (A) and experimental PL saturation results from ref. 2. **(C)** The areal hourly energy yield of the QC/PV device, calculated using the model from Figure 4 of the main text and assuming 100% optical coupling of the QC PL. **(D)** The corresponding percent increase in areal hourly energy yield relative to a standard SHJ PV without a QC layer, in Colorado with two-axis tracking.

**Table S1.** Collection of symbols, their meanings, and their units used in the calculation.

| Symbol              | Meaning                                                                                    | Unit                 |
|---------------------|--------------------------------------------------------------------------------------------|----------------------|
| $PCE$               | Device power conversion efficiency                                                         | %                    |
| $P_{device}$        | Areal power generated by a device                                                          | $W\ m^{-2}$          |
| $P_{sun}$           | Areal power from the sun incident on a device                                              | $W\ m^{-2}$          |
| $J_{op}$            | Operating current density                                                                  | $A\ m^{-2}$          |
| $V_{op}$            | Operating voltage                                                                          | V                    |
| $\Phi_{AM1.5G}$     | One-sun solar spectral irradiance                                                          | $W\ m^{-2}\ eV^{-1}$ |
| $E$                 | Energy, typically of photons                                                               | eV                   |
| $n$                 | Refractive index                                                                           | -                    |
| $h$                 | Planck's constant                                                                          | J s                  |
| $c$                 | Speed of light                                                                             | $M\ s^{-1}$          |
| $q$                 | Elementary charge of an electron                                                           | C                    |
| $V$                 | Voltage                                                                                    | V                    |
| $T$                 | Temperature                                                                                | K                    |
| $\alpha_{PV}$       | Photovoltaic absorption probability                                                        | -                    |
| $\alpha_{QC}$       | Quantum cutter absorption probability                                                      | -                    |
| $\bar{\alpha}_{PV}$ | Photovoltaic absorption probability weighted by quantum cutter photoluminescence linewidth | -                    |
| $E_{QC}$            | Energy of quantum cutter emission                                                          | eV                   |
| $\phi$              | Photoluminescence quantum yield (PLQY)                                                     | -                    |
| $\xi$               | Efficiency of optical coupling between the quantum cutter and photovoltaic                 | -                    |
| $\eta$              | Overall quantum cutting efficiency                                                         | -                    |
| $I_{QC}$            | Normalized spectra line shape of the quantum cutter's photoluminescence                    | -                    |

- 1 M. Sengupta, Y. Xie, A. Lopez, A. Habte, G. Maclaurin and J. Shelby, *Renewable and Sustainable Energy Reviews*, 2018, **89**, 51–60.
- 2 C. S. Erickson, M. J. Crane, T. J. Milstein and D. R. Gamelin, *J. Phys. Chem. C*, DOI:10.1021/acs.jpcc.9b01296.
